1 **Associations between wearing masks, washing hands, and social distancing practices, and**  
2 **risk of COVID-19 infection in public: a cohort-based case-control study in Thailand**

3  
4 Pawinee Doung-ngern PhD,<sup>1</sup> Repeepong Suphanchaimat PhD,<sup>1,2</sup> Apinya Panjangampatthana  
5 BSc,<sup>1</sup> Chawisar Janekrongtham MD,<sup>1</sup> Duangrat Ruampoom BSc,<sup>1</sup> Nawaporn Daochaeng BSc,<sup>1</sup>  
6 Napatchakorn Eungkanit BSc,<sup>1</sup> Nichakul Pisitpayat MD,<sup>1</sup> Nuengruethai Srisong BSc,<sup>1</sup> Oiythip  
7 Yasopa BSc,<sup>1</sup> Patchanee Plernprom BSc,<sup>1</sup> Pitiphon Promduangsi MD,<sup>1</sup> Panita Kumphon BSc,<sup>1</sup>  
8 Paphanij Suangtho MPH,<sup>1</sup> Peeriya Watakulsin MD,<sup>1</sup> Sarinya Chaiya BSc,<sup>1</sup> Somkid  
9 Kripattanapong BSc,<sup>1</sup> Thanawadee Chantian MPH,<sup>1</sup> Chawetsan Namwat MPH,<sup>1,2</sup> Direk  
10 Limmathurotsakul PhD,<sup>3,4,5</sup>

11  
12 <sup>1</sup> Department of Disease Control, Ministry of Public Health, Tiwanon Road, Nonthaburi, 11000,  
13 Thailand.

14 <sup>2</sup> International Health Policy Program (IHPP), Ministry of Public Health, Tiwanon Road,  
15 Nonthaburi, 11000, Thailand.

16 <sup>3</sup> Mahidol-Oxford Tropical Medicine Research Unit, Faculty of Tropical Medicine, Mahidol  
17 University, Rajvithi Road, Bangkok, 10400, Thailand

18 <sup>4</sup> Department of Tropical Hygiene, Faculty of Tropical Medicine, Mahidol University, Rajvithi  
19 Road, Bangkok, 10400, Thailand

20 <sup>5</sup> Centre for Tropical Medicine and Global Health, Nuffield Department of Medicine, University  
21 of Oxford, Old Road Campus, Oxford, OX3 7LG, United Kingdom

22

23 **Corresponding author:** Direk Limmathurotsakul, 420/6 Mahidol-Oxford Tropical Medicine

24 Research Unit, Faculty of Tropical Medicine, Rajvithi Road, Bangkok, Thailand, 10400. Tel.

25 +66-2-203-6333 Email: [direk@tropmedres.ac](mailto:direk@tropmedres.ac)

26

27 **Alternate corresponding author:** Pawinee Doung-ngern, Department of Disease Control,

28 Ministry of Public Health, Nonthaburi, 11000, Thailand. Email: [pawind@gmail.com](mailto:pawind@gmail.com)

29

30 **Word count:** Abstract 292, Main Text 3,397

31 **Keywords:** COVID-19, SARS-CoV-2, mask, medical mask, non-medical mask, hand washing,

32 social distancing, contact tracing

33

34 **Summary**

35 **Background.** Effectiveness of personal protective measure against COVID-19 infection is largely  
36 unknown.

37

38 **Methods.** We conducted a retrospective case-control study, using a cohort of contact tracing  
39 records in Thailand. A total of 1,050 asymptomatic contacts of COVID-19 patients between 1 and  
40 31 March 2020 were retrospectively interviewed by phone about their protective measures against  
41 COVID-19 infection. Cases were defined as asymptomatic contacts who were diagnosed with  
42 COVID-19 by 21 April 2020. Multilevel mixed-effect logistic regression models were used

43

44 **Findings.** Overall, 211 (20%) were diagnosed with COVID-19 by 21 Apr 2020 (case group) while  
45 839 (80%) were not (control group). Fourteen percent of cases (29/210) and 24% of controls  
46 (198/823) reported wearing either non-medical or medical masks all the time during the contact  
47 period. Wearing masks all the time (adjusted odds ratio [aOR] 0.23; 95%CI 0.09-0.60) was  
48 independently associated with lower risk of COVID-19 infection compared to not wearing masks,  
49 while wearing masks sometimes (aOR 0.87; 95%CI 0.41-1.84) was not. Shortest distance of  
50 contact >1 meter (aOR 0.15; 95%CI 0.04-0.63), duration of close contact  $\leq$ 15 minutes (aOR 0.24;  
51 95%CI 0.07-0.90) and washing hands often (aOR 0.33; 95%CI 0.13-0.87) were significantly  
52 associated with lower risk of infection. Sharing a cigarette (aOR 3.47; 95%CI 1.09-11.02) was  
53 associated with higher risk of infection. Those who wore masks all the time were more likely to  
54 wash hands and practice social distancing. We estimated that if everyone wore a mask all the time,  
55 washed hands often, did not share a dish, cup or cigarette, maintained distances >1 meter and spent  
56  $\leq$ 15 minutes with close contacts, cases would have been reduced by 84%.

57

58 **Interpretation.** Our findings support consistently wearing masks, washing hands, and social  
59 distancing in public to protect against COVID-19 infections. Combining measures could  
60 substantially reduce infections in Thailand.

61

62 **Funding:** The study was supported by the DDC, MoPH, Thailand. DL is supported by the  
63 Wellcome Trust (106698/Z/14/Z).

64

## 65 **Introduction**

66 There is an urgent need to evaluate the effectiveness of wearing masks by healthy persons in the  
67 general public against COVID-19 infections. During the early stages of the outbreak of COVID-  
68 19, the World Health Organization (WHO) announced on 27 February 2020 that, “For  
69 asymptomatic individuals, wearing a mask of any type is not recommended”.<sup>1</sup> The rationale, at  
70 that time, was to avoid unnecessary cost, procurement burden, and a false sense of security.<sup>1</sup> A  
71 number of systematic reviews also found no conclusive evidence to support the widespread use of  
72 masks in public against respiratory infectious diseases such as influenza, SARS and COVID-19.<sup>2-</sup>  
73 <sup>4</sup> However, China and many countries in Asia including South Korea, Japan and Thailand have  
74 recommended the use of face mask among the general public since early in the outbreak.<sup>5</sup> There  
75 is also increasing evidence that COVID-19 patients can have a “pre-symptomatic” period, during  
76 which infected persons can be contagious and, therefore, transmit the virus to others before  
77 symptoms develop.<sup>6</sup> This led to the change of the recommendation of the US Centers for Disease  
78 Control and Prevention, updated on 4 April 2020, from warning the public against wearing face  
79 masks to advising everyone to wear a cloth face covering when in public.<sup>7</sup> On 6 April and 5 June  
80 2020, WHO updated their advice on the use of masks for the general public, and encouraged  
81 countries to conduct research on this topic.<sup>6</sup>

82  
83 Thailand has been implementing multiple measures to mitigate transmission of COVID-19 since  
84 the beginning of the outbreak. The country has established thermal screening at airports since 3  
85 January 2020, and detected the first case of COVID-19 outside China, a traveler from Wuhan  
86 arriving at Bangkok Suvarnabhumi airport, on 8 January 2020.<sup>8</sup> The country utilized the  
87 Surveillance and Rapid Response Team (SRRT), together with Village Health Volunteers, to

88 perform contact tracing, educate the public about the disease and monitor the close contacts of  
89 COVID-19 patients in quarantine. The SRRT is an epidemiologic investigation team trained to  
90 conduct surveillance, investigations and initial controls of communicable diseases; including  
91 H5N1, SARS and MERS.<sup>9</sup> Currently, there are more than 1,000 SRRTs established at district,  
92 provincial and regional levels in the country,<sup>9</sup> working on contact tracing for COVID-19. In  
93 February 2020, public pressure to wear masks was high, medical masks were difficult to procure  
94 by the public, and the government categorized medical masks as price-controlled goods and  
95 announced COVID-19 as a dangerous communicable disease according to the Communicable  
96 Disease Act 2015 in order to empower officials to quarantine contacts and close venues. On 3  
97 March, the Ministry of Public Health (MoPH) announced the recommendation of cloth mask for  
98 the public. On 18 March, schools, universities, bars, nightclubs and entertainment venues were  
99 closed. On 26 March, while the country was reporting approximately 100-150 new COVID-19  
100 patients per day, the government declared a national state of emergency, prohibited public  
101 gatherings, and enforced everyone to wear a face mask on public transport.<sup>10</sup> On 21 April, 19 new  
102 PCR-confirmed COVID-19 patients were announced by the MoPH, Thailand, bringing the total  
103 number of patients to 2,811 patients.<sup>10</sup>

104  
105 Given the lack of currently available evidence, we evaluated the effectiveness of mask wearing,  
106 hand washing, social distancing and other protective measures against COVID-19 infection in  
107 public in Thailand

108

## 109 **Methods**

### 110 **Study design and participants.**

111 We conducted a retrospective case-control study in which both cases and controls were drawn  
112 from a cohort of contact tracing records of the central SRRT team, Department of Disease Control  
113 (DDC), MoPH, Thailand (Figure 1). Contacts were defined by the DDC MoPH as individuals who  
114 had activities together with or were in the same location(s) as a COVID-19 patient.<sup>11,12</sup> The main  
115 aim of contact tracing was to identify and evaluate contacts, perform PCR diagnostic tests, and  
116 quarantine high-risk contacts. Contacts were tested with PCR assays per national contact tracing  
117 guidelines (Supplementary Text).<sup>11,12</sup> All PCR tests were performed at laboratories certified for  
118 COVID-19 testing by the National Institute of Health of Thailand. Data on risk factors associated  
119 with COVID-19 infection, such as type of contact and use of mask, were recorded during the  
120 contact investigation, but not complete.

121  
122 The central SRRT team was tasked to perform contact investigations for any cluster with at least  
123 five PCR-confirmed COVID-19 patients from the same location(s) within a one-week period.<sup>11</sup>  
124 We primarily used these data to identify asymptomatic contacts of COVID-19 patients between 1  
125 and 31 March 2020. To reduce the bias of the selection of asymptomatic contacts, all contact  
126 tracing records of the central SRRT team were used in the study.

127

## 128 **Procedures**

129 We then conducted telephone calls and asked details about their contacts with COVID-19 patients  
130 (e.g. date, location, duration and distance of contacts), whether they wore masks, washed their  
131 hands and performed social distancing during the contact period, and whether the COVID-19  
132 patient, if known, wore a mask. We also asked, and checked using records of the DDC, whether  
133 and when they were sick and diagnosed with COVID-19. To include only asymptomatic contacts

134 in the study, we excluded people from the analysis who already had any symptoms of COVID-19  
135 on the first day of contact. We also excluded contacts whose contact locations were healthcare  
136 facilities because this study aimed to focus on infection in the public.

137  
138 Asymptomatic contacts, cases, controls, index patients, primary index patients and COVID-19  
139 patients were defined as described in Table 1. The reporting of this study follows the STROBE  
140 guidelines.

141  
142 **Selection of cases and controls**

143 We defined asymptomatic contacts who were later diagnosed as COVID-19 patients using PCR  
144 assays by 21 Apr 2020 as cases (Table 1). All asymptomatic contacts who were not diagnosed as  
145 COVID-19 patients using PCR assays by 21 Apr 2020 were controls. We arbitrarily used 21 days  
146 after 31 March as the cutoff based on the evidence that most COVID-19 patients would likely  
147 develop symptoms within 14 days<sup>13</sup> and it should take less than another 7 days for symptomatic  
148 patients to present at healthcare facilities and be tested for COVID-19 with PCR assays.

149  
150 **Statistical analysis**

151 Odds ratios (OR) and 95% confidence intervals were estimated for associations between  
152 development of COVID-19 and baseline covariates, such as wearing masks, washing hands and  
153 social distancing using logistic regression with a random effect for location and a random effect  
154 for index patient nested within the same location. The interviewer identified the index patient, the  
155 symptomatic COVID-19 patient who had the closest contact, if an asymptomatic contact had  
156 contacted with more than one symptomatic COVID-19 patient. The percentage of missing values



157 in the variable whether the COVID-19 patients wore a mask was 27%, and the variable was not  
158 included in the analyses. We assumed that missing values were missing at random and used  
159 imputation by chained equations. We created 10 imputed datasets and the imputation model  
160 included all listed confounders and the case-control indicator. We developed the final multilevel  
161 mixed-effect logistic regression models on the basis of previous knowledge and a purposeful  
162 selection method.<sup>14</sup> Compliance of wearing mask was strongly associated with lower risk of  
163 COVID-19 infection in multivariable models, while type of mask was not. Due to the collinearity  
164 between the two variables, type of mask was not included in the final model.

165  
166 We also estimated OR and 95% confidence intervals for associations between compliance of mask  
167 wearing and other practices; including washing hands and social distancing using multinomial  
168 logistic regression models and the imputed data set. Logistic regression was also used to estimate  
169 p-values for pairwise comparisons. Bonferroni correction was not performed. We estimated  
170 secondary attack rate using definitions as described in Table 1, to allow for comparison with other  
171 studies.

172  
173 We conducted a sensitivity analysis by including type of mask in the multilevel mixed-effects  
174 logistic regression model for COVID-19 infection. We also tested a pre-defined interaction  
175 between type of mask and compliance of wearing masks.

176  
177 To respond to national policy, we also estimated population attributable fraction (PAF) using the  
178 imputed dataset and a direct method based on logistic regression as described previously  
179 (Supplementary Text).<sup>15,16</sup> The final multivariable model was modified by considering each risk

180 factor dichotomously, and PAF was calculated by subtraction of the total number of predicted  
181 cases from total number of observed cases, divided by the total number of observed cases. STATA  
182 version 14.2 and R version 4.0.0 were used for all analyses.

183  
184 **Role of the funding source:** The study sponsor did not participate in study design, data collection,  
185 analysis, interpretation of data, or writing of the article. PD, RS and DL had access to all the data  
186 in the study.

187  
188 **RESULTS**

189 Contact tracing by the central SRRT team consisted of 1,716 individuals who had contact with or  
190 were in the same location as a COVID-19 patient, and who were associated with three large clusters  
191 in nightclubs, boxing stadiums and a state enterprise office in Thailand (Figure 1). Overall, we  
192 considered 18 individuals as primary index patients because they were the first to have symptoms  
193 at those places, had symptoms since the first day of visiting those places, or were considered to be  
194 the origin of infection of cases based on the contact investigations; 11 from the nightclub cluster,  
195 5 from the boxing stadium cluster and 2 from the state enterprise office cluster. Timelines of  
196 primary index patients from nightclub, boxing stadium and state enterprise clusters are described  
197 in details in Supplementary Text and Supplementary Figure 1-3. All 18 primary index patients  
198 were excluded from the analysis of the case-control study.

199  
200 After retrospectively interviewing each contact by phone and applying the exclusion criteria  
201 (Figure 1), we included 1,050 asymptomatic contacts who had contact with or were in the same  
202 location as a symptomatic COVID-19 patient between 1 and 31 March 2020 in the analysis. The

203 median age of individuals was 38 years (IQR 28-51) and 55% were male (Table 1). Most  
204 asymptomatic contacts included in the study were associated with the boxing stadium cluster (61%,  
205 n=645), with 36% (n=374) with the nightclub cluster, and 3% (n=31) with the state enterprise  
206 office cluster.

207  
208 Overall, 211 (20%) asymptomatic contacts were later diagnosed with COVID-19 by 21 Apr 2020  
209 (case group) and 839 (80%) were not (control group). Of the 211 cases, 150 (71%) had symptoms  
210 prior to the diagnosis of COVID-19 using PCR assays. The last date that a COVID-19 case was  
211 diagnosed was 9 April 2020. Of 839 controls, 719 (86%) were tested with PCR assays at least once.

212  
213 Figure 2 illustrates contacts (and possible transmission of COVID-19 infections) between index  
214 patients to asymptomatic contacts included in the study. A total of 228, 144 and 20 asymptomatic  
215 contacts had contact with index patients at nightclubs, boxing stadiums and the state enterprise  
216 office, respectively. The others were contacts of cases related to nightclubs, boxing stadiums and  
217 the state enterprise office at workplaces (n=277), households (n=230) and other places (n=151).

218  
219 **Primary analysis**

220 Table 2 shows there was a negative association between risk of COVID-19 infection and shortest  
221 distance of contact >1 meter (adjusted odds ratio [aOR] 0.15, 95% confidence interval [CI] 0.04-  
222 0.63), duration of contact ≤15 minutes (aOR 0.24, 95%CI 0.07-0.90), washing hands often (aOR  
223 0.33, 95%CI 0.13-0.87) and wearing masks all the time (aOR 0.23, 95%CI 0.09-0.60). Wearing  
224 masks sometimes was not significantly associated with lower risk of infection (aOR 0.87, 95%CI  
225 0.41-1.84), whereas sharing cigarettes was associated with higher risk of COVID-19 infection

226 (aOR 3.47, 1.09-11.02). Type of mask was associated with infection at the univariable model.  
227 Compliance of wearing masks was strongly associated with lower risk of COVID-19 infection in  
228 multivariable models, while type of mask was not. Due to the collinearity between the two  
229 variables, type of mask was not included in the final model.

230

### 231 **Association between compliance of mask wearing and other social distancing practices.**

232 Since wearing masks all the time was found to be negatively associated with COVID-19 infection,  
233 we wanted to explore characteristics of those patients because of a potential false sense of security  
234 caused by wearing masks. We found that those who wore masks all the time were more likely to  
235 have shortest distance of contact >1 meter (25% vs. 18%, pairwise  $p=0.03$ ), have duration of  
236 contact  $\leq 15$  minutes (26% vs 13%, pairwise  $p<0.001$ ) and wash their hands often (79% vs. 26%,  
237 pairwise  $p<0.001$ ) compared with those who did not wear masks (Table 3). We found that those  
238 who wore masks sometimes were more likely to wash their hands often (43% vs. 26%, pairwise  
239  $p<0.001$ ) compared with those who did not wear masks. However, they were more likely to have  
240 physical contact (50% vs. 42%, pairwise  $p=0.03$ ) and duration of contact >60 minutes (75% vs.  
241 67%, pairwise  $p=0.04$ ) compared with those who did not wear masks.

242

### 243 **Secondary attack rate**

244 Overall, 982 (94%) were contacts with high-risk exposure. All 68 asymptomatic contacts without  
245 high-risk exposure were controls. Among asymptomatic contacts with high-risk exposure included  
246 in the study, the nightclub secondary attack rate was 16% (35/213), the boxing stadium secondary  
247 attack rate was 87% (125/144), the workplace secondary attack rate was 4% (11/250), the

248 household secondary attack rate was 17% (38/230), and the secondary attack rate at other places  
249 was 1% (2/145).

250

### 251 **Sensitivity analyses**

252 To determine if type of mask was independently associated with infection, we included type of  
253 mask in the multivariable model (Supplementary Table 1). Type of mask was not independently  
254 associated with infection ( $p=0.55$ ). Interaction between type of mask and compliance of mask  
255 wearing was not observed.

256

### 257 **Population attributable fraction (PAF)**

258 Using the direct method to calculate PAF, we estimated that the proportional reduction in cases  
259 that would occur if everyone wore a mask all the time during contact with index patients was 0.28  
260 (Table 4). Among modifiable risk factors evaluated, PAF of shortest distance of contact <1 meter  
261 was highest at 0.40. If everyone wore a mask all the time, washed hands often, did not share a dish,  
262 cup or cigarette, had shortest distance of contact >1 meter and had duration of close contact  $\leq 15$   
263 min, cases would have been reduced by 84%. The reduction could be as high as 97% to 99% in  
264 most places under evaluation, except boxing stadiums with an estimated reduction of 75%.

265

### 266 **DISCUSSIONS**

267 This cohort-based case-control study provides a supporting evidence that wearing masks, washing  
268 hands and social distancing are independently associated with lower risk of COVID-19 infection  
269 in the general public. We observed that wearing masks all the time when exposed to someone with  
270 COVID-19 was associated with lower risk of infection, while wearing masks sometimes was not.

271 This supports the recommendation that people should be wearing their masks correctly at all times  
272 in public and at home when there is an increased risk.<sup>5-7</sup>

273  
274 We quantified the effectiveness of different measures that could be implemented to protect against  
275 COVID-19 infections in nightclubs, stadiums, workplaces and other public gathering places. We  
276 estimated that adopting all recommendations (wearing masks all the time, washing hands often,  
277 not sharing dishes, cups or cigarettes, maintaining a distance of <1 meter and spending  $\leq 15$  minutes  
278 with a close contact) could result in controlling 84% of the burden of COVID-19 infections in our  
279 setting during the study period. We recommend that all public gathering places consider all  
280 measures to protect against COVID-19 and new pandemic diseases in the future.

281  
282 The effectiveness of wearing masks observed in this study is consistent with previous studies;  
283 including a randomized-controlled trial (RCT) showing that adherent use of a face mask reduce  
284 the risk of influenza-like illness<sup>17</sup> and case-control studies which found that wearing masks is  
285 associated with lower risk of SARS infection.<sup>18-20</sup> While previous studies found use of surgical  
286 masks or 12–16-layer cotton masks demonstrated protection against coronavirus infection in the  
287 community,<sup>18-20</sup> we did not observe a difference between wearing non-medical and medical masks  
288 in the general population. Therefore, we strongly support wearing non-medical masks in public to  
289 protect against COVID-19 infections. Even though the risk perception of COVID-19 threat can  
290 increase the likelihood of wearing medical masks in other settings,<sup>21</sup> we maintain that medical  
291 masks should be reserved for healthcare workers.

292

293 This study found a negative association between risk of COVID-19 infection and social distancing  
294 (i.e. distance and duration of contact), which is consistent with previous studies which found that  
295 at least 1-meter physical distancing was strongly associated with a large protective effect, and  
296 distances of 2 meters could be more effective.<sup>20</sup> Effectiveness of hand hygiene is consistent with  
297 the previous studies.<sup>22</sup>

298  
299 The household secondary attack rate in our study (17%) is comparable with those reported ranging  
300 from 11% to 19%,<sup>23,24</sup> and relatively high compared to workplaces and other places. While  
301 challenging and sometimes impractical, household members should immediately separate a person  
302 who develops any possible symptoms of COVID-19 from other household members (i.e. a sick  
303 person should stay in a specific room, use a separate bathroom, if possible, and do not share dishes,  
304 cups and other utensils in the households).<sup>25</sup> All household members should be encouraged to wear  
305 masks, keep washing hands and perform social distancing to the extent possible.<sup>26</sup>

306  
307 The high number of COVID-19 patients associated with nightclubs in Bangkok is comparable to  
308 COVID-19 outbreak associated with Itaewon nightclub cluster in Seoul, Korea, in May 2020.<sup>27</sup>  
309 Similarly, we also found individuals who visited several nightclubs in the same area during the  
310 short period of time. The high number of COVID-19 patient cluster associated with boxing  
311 stadiums in Bangkok is similar to a cluster likely to have been associated with a football match in  
312 Italy in February 2020.<sup>28</sup> The secondary attack rate of COVID-19 at a choir practice in the U.S.  
313 was reported to be as high as 53%,<sup>29</sup> and the secondary attack rates in public gathering places with  
314 high density of people shouting and cheering, such as football and boxing stadiums, are still largely  
315 unknown.

316

317 It is likely that clear and consistent public messaging from policy makers prevents a false sense of  
318 security and promotes compliance with social distancing in Thailand. We found that those who  
319 wore masks all the time were also more likely to wash hands and perform social distancing. It is  
320 recommended that both mainstream and social media support public health responses by teaming  
321 with government in providing consistent, simple and clear messages.<sup>30</sup> Both positive and negative  
322 messages can influence the public.<sup>30</sup> In Thailand, daily briefings of Thailand's Centre for COVID-  
323 19 Situation Administration (CCSA) gave clear and consistent messages on social distancing every  
324 day, as well as how to put on a mask and wash hands. The regular situation reports and advices by  
325 CCSA may have improved the confidence in the public and compliance with the recommendations.

326

327 Nonetheless, public messaging on how to wear masks correctly needs to be consistently delivered,  
328 particularly among those who wear masks sometimes or incorrectly (e.g. not covering both nose  
329 and mouth). This is because, based on our findings, those who wear masks intermittently could be  
330 a group that did not practice social distancing adequately.

331

332 There are several limitations of the study. First, our finding might not be generalizable to all  
333 settings, since findings were based on contacts associated with three major COVID-19 clusters in  
334 Thailand during March 2020. Second, the estimated odds ratios were based on a condition that the  
335 contact with index patients occurred. Our study did not evaluate or take into account the probability  
336 of contacting index patients in public. Our study also lacked power to evaluate whether wearing  
337 masks by index patients can prevent infecting others in public. Third, our findings were based on  
338 PCR testing per national contact tracing guideline,<sup>11,12</sup> and as such the estimated odds ratios might



339 not take account of all asymptomatic infections. Fourth, it is impossible to identify every potential  
340 contact an individual has and some individuals may have been contacts to more than one COVID-  
341 19 patient. Hence, our estimated secondary attack rates among contacts with high-risk exposure  
342 could be over or under-estimated. Fifth, findings were subject to common biases of retrospective  
343 case-control studies; including memory bias, observer bias and information bias. Nonetheless, we  
344 used structured interviews, whereby each participant was asked the same set of defined questions,  
345 to reduce potential biases.

346

347 As measures against COVID-19 are being implemented or relaxed in many countries worldwide,  
348 it is important that we continue to expand our understanding about the effectiveness of each  
349 personal protective measure. Wearing masks, washing hands and social distancing are strongly  
350 associated with lower risk of COVID-19 infections. We strongly support wearing non-medical  
351 masks in public to protect against COVID-19 infections. We also suggest that medical masks  
352 should be reserved for healthcare workers. Everyone should also wash their hands frequently and  
353 comply with recommendations of social distancing.

354

355

356 **Research in context**

357 **Evidence before this study**

358 We searched PubMed and medRxiv for peer-reviewed articles, preprints and research reports on  
359 effectiveness of wearing masks, washing hands, and social distancing against COVID-19 and  
360 related diseases; including severe acute respiratory syndrome (SARS) and Middle East respiratory  
361 syndrome (MERS). We identified two case-control studies from China and one cohort study from  
362 Vietnam evaluating effectiveness of wearing masks against SARS in public. A recent meta-  
363 analysis estimated an overall relative risk of wearing masks in public (0.56; 95%CI 0.40-0.79)  
364 based on the three studies. A meta-analysis including six case-control studies on SARS estimated  
365 odds ratio of hand washing more than 10 times daily in preventing disease transmission (0.45;  
366 95%CI 0.36-0.57). The recent meta-analysis found a negative association between risk of infection  
367 and physical distancing; six of 38 studies included were on COVID-19. No comparative studies of  
368 wearing masks or washing hands in public against COVID-19 infections were identified.

369

370 **Added value of this study**

371 We did a cohort-based case-control study of 1,050 asymptomatic contacts of COVID-19 patients  
372 in the general public in Thailand. Our findings are, to the best of our knowledge, the first  
373 comparative study to quantitatively assess the protective effects of wearing masks and washing  
374 hands against COVID-19 infections in the general population. We observed that wearing masks  
375 all the time when exposed to someone with COVID-19 was associated with lower risk of infection,  
376 while wearing masks sometimes was not. We also found that those who wore masks all the time  
377 were more likely to perform social distancing, while those who wore masks intermittently were  
378 less likely to. We estimated that adopting all recommendations (wearing masks all the time,

379 washing hands often, not sharing dishes, cups or cigarettes, maintaining a distance of <1 meter and  
380 spending <15 minutes with a close contact) could result in controlling 84% of the burden of  
381 COVID-19 infections in our setting during the study period. The reduction could be as high as  
382 97% to 99% in most places, except boxing stadiums with an estimated reduction of 75%.

383

#### 384 **Implication of all the available evidence**

385 As lockdowns are being relaxed in many countries, our findings provide some evidence supporting  
386 consistently wearing non-medical mask, washing hands, and performing social distancing to  
387 protect against COVID-19 in public gathering places. The effectiveness of complying with all  
388 measures could be high. However, in places with a high density of people, additional measures  
389 may be required. Policy makers should strive to deliver public messaging on recommendations  
390 against COVID-19 infection clearly and consistently, particularly among those who wear masks  
391 intermittently or incorrectly. Our data also showed that no protective measure was associated with  
392 complete protection from COVID-19 infection. All measures, including wearing non-medical  
393 masks, washing hands, and social distancing are required to protect against COVID-19 infections  
394 in public.

395

396

397 **Contributors**

398 PD, RS, CN and DL contributed to design of the study. PD, RS and DL contributed to setting up  
399 the database and quality control. AP, CJ, DR, ND, NE, NP, NS, OY, PaP, PiP, PK, PS, PW, SC,  
400 SK and TC contributed to data collection. DL carried out the main statistical analysis. PD and RS  
401 coordinated the study and contributed to the statistical analyses. PD, RS and DL contributed to  
402 interpretation of the results and drafted the manuscript. All authors commented on drafts and read  
403 and approved the final manuscript. The corresponding author attests that all listed authors meet  
404 authorship criteria and that no others meeting the criteria have been omitted. PD is the guarantor.

405

406 **Declaration of interests:** We declare no competing interests.

407

408 **Data sharing:** All data in aggregate are reported in the manuscript.

409

410 **Acknowledgement:**

411 We thank all participants and all COVID-19 patients involved in providing information. We thank  
412 all SRRT members at the central, regional, provincial and district levels, as well as all Village  
413 Health Volunteers in Thailand. We thank Pattraporn Klanjatturat and Inthira Yamabhai for the  
414 technical assistance. We thank Dr. Suwannachai Wattanayingcharoenchai, Dr. Sombat  
415 Thanprasertkul, Dr. Panithee Thammawijaya and Dr. Walairat Chaifoo of the DDC, MoPH, and  
416 Dr. Virsasakdi Chongsuvivatwong from Prince of Songkhla University for their advices and  
417 direction.

418

419 **Funding:** The study was supported by the DDC, MoPH, Thailand. DL is supported by the  
420 Wellcome Trust (106698/Z/14/Z). The study sponsors did not participate in study design, data  
421 collection, analysis, interpretation of data, or writing of the article.

422  
423 **Ethical approval:** As this study was part of the routine situation analysis and outbreak  
424 investigation of the DDC MoPH Thailand, it was not required to obtain ethics approval and no  
425 written informed consent was collected. However, the study team strictly followed ethical  
426 standards in research; that is, all individual information was strictly kept confidential and not  
427 reported in the paper. The DDC MoPH Thailand approved the analysis and reporting of data in  
428 aggregate.

429

430 **References**

- 431 1. WHO. Rational use of personal protective equipment for coronavirus disease (COVID-  
432 19): interim guidance, 27 February 2020. <https://apps.who.int/iris/handle/10665/331215>  
433 (accessed 16 June 2020).
- 434 2. Long Y, Hu T, Liu L, et al. Effectiveness of N95 respirators versus surgical masks  
435 against influenza: A systematic review and meta-analysis. *J Evid Based Med* 2020.
- 436 3. Cowling BJ, Zhou Y, Ip DK, Leung GM, Aiello AE. Face masks to prevent transmission  
437 of influenza virus: a systematic review. *Epidemiol Infect* 2010; **138**(4): 449-56.
- 438 4. Jefferson T, Del Mar CB, Dooley L, et al. Physical interventions to interrupt or reduce  
439 the spread of respiratory viruses. *Cochrane Database Syst Rev* 2011; (7): CD006207.
- 440 5. Feng S, Shen C, Xia N, Song W, Fan M, Cowling BJ. Rational use of face masks in the  
441 COVID-19 pandemic. *Lancet Respir Med* 2020.
- 442 6. WHO. Advice on the use of masks in the context of COVID-19: interim guidance, 5 June  
443 2020. <https://apps.who.int/iris/handle/10665/332293> (accessed 16 June 2020).
- 444 7. Centers for Disease Control and Prevention. Coronavirus disease 2019 (COVID-19) How  
445 to Protect Yourself and Others 2020. [https://www.cdc.gov/coronavirus/2019-ncov/prevent-  
446 getting-sick/prevention-H.pdf](https://www.cdc.gov/coronavirus/2019-ncov/prevent-getting-sick/prevention-H.pdf) (accessed 16 June 2020).
- 447 8. Okada P, Buathong R, Phuygun S, et al. Early transmission patterns of coronavirus  
448 disease 2019 (COVID-19) in travellers from Wuhan to Thailand, January 2020. *Euro Surveill*  
449 2020; **25**(8).
- 450 9. Chunsuttiwat S. Response to avian influenza and preparedness for pandemic influenza:  
451 Thailand's experience. *Respirology* 2008; **13 Suppl 1**: S36-40.

- 452 10. WHO Thailand. Coronavirus disease 2019 (COVID-19) WHO Thailand Situation Report  
453 - 21 April 2020 2020 [https://www.who.int/docs/default-source/searo/thailand/2020-04-21-tha-](https://www.who.int/docs/default-source/searo/thailand/2020-04-21-tha-sitrep-59-covid19-new-template-final.pdf?sfvrsn=31bc500a_0)  
454 [sitrep-59-covid19-new-template-final.pdf?sfvrsn=31bc500a\\_0](https://www.who.int/docs/default-source/searo/thailand/2020-04-21-tha-sitrep-59-covid19-new-template-final.pdf?sfvrsn=31bc500a_0) (accessed 16 June 2020).
- 455 11. Department of Disease Control, Ministry of Public Health, Thailand. Coronavirus  
456 Disease 2019: COVID-19, updated on 3 March 20202020.  
457 [https://ddc.moph.go.th/viralpneumonia/file/guidelines/G\\_Invest\\_03\\_2.pdf](https://ddc.moph.go.th/viralpneumonia/file/guidelines/G_Invest_03_2.pdf) (accessed 16 June  
458 2020).12. Department of Disease Control, Ministry of Public Health, Thailand. Coronavirus  
459 Disase 2019: COVID-19, updated on 23 March 20202020.  
460 [https://ddc.moph.go.th/viralpneumonia/file/g\\_srrt/g\\_srrt\\_250363.pdf](https://ddc.moph.go.th/viralpneumonia/file/g_srrt/g_srrt_250363.pdf) (accessed 16 June 2020).
- 461 13. Lauer SA, Grantz KH, Bi Q, et al. The Incubation Period of Coronavirus Disease 2019  
462 (COVID-19) From Publicly Reported Confirmed Cases: Estimation and Application. *Ann Intern*  
463 *Med* 2020.
- 464 14. Bursac Z, Gauss CH, Williams DK, Hosmer DW. Purposeful selection of variables in  
465 logistic regression. *Source Code Biol Med* 2008; **3**: 17.
- 466 15. Azimi SS, Khalili D, Hadaegh F, Yavari P, Mehrabi Y, Azizi F. Calculating population  
467 attributable fraction for cardiovascular risk factors using different methods in a population based  
468 cohort study. *J Res Health Sci* 2015; **15**(1): 22-7.
- 469 16. Ruckinger S, von Kries R, Toschke AM. An illustration of and programs estimating  
470 attributable fractions in large scale surveys considering multiple risk factors. *BMC Med Res*  
471 *Methodol* 2009; **9**: 7.
- 472 17. MacIntyre CR, Cauchemez S, Dwyer DE, et al. Face mask use and control of respiratory  
473 virus transmission in households. *Emerg Infect Dis* 2009; **15**(2): 233-41.

- 474 18. Wu J, Xu F, Zhou W, et al. Risk factors for SARS among persons without known contact  
475 with SARS patients, Beijing, China. *Emerg Infect Dis* 2004; **10**(2): 210-6.
- 476 19. Lau JT, Tsui H, Lau M, Yang X. SARS transmission, risk factors, and prevention in  
477 Hong Kong. *Emerg Infect Dis* 2004; **10**(4): 587-92.
- 478 20. Chu DK, Akl EA, Duda S, et al. Physical distancing, face masks, and eye protection to  
479 prevent person-to-person transmission of SARS-CoV-2 and COVID-19: a systematic review and  
480 meta-analysis. *Lancet* 2020.
- 481 21. Huynh TD. The more I fear about COVID-19, the more I wear medical masks: A survey  
482 on risk perception and medical masks uses. *medRxiv* 2020: 2020.03.26.20044388.
- 483 22. Jefferson T, Del Mar C, Dooley L, et al. Physical interventions to interrupt or reduce the  
484 spread of respiratory viruses: systematic review. *BMJ* 2009; **339**: b3675.
- 485 23. Bi Q, Wu Y, Mei S, et al. Epidemiology and transmission of COVID-19 in 391 cases and  
486 1286 of their close contacts in Shenzhen, China: a retrospective cohort study. *Lancet Infect Dis*  
487 2020.
- 488 24. Jing Q-L, Liu M-J, Yuan J, et al. Household Secondary Attack Rate of COVID-19 and  
489 Associated Determinants. *medRxiv* 2020: 2020.04.11.20056010.
- 490 25. Centers for Disease Control and Prevention. Coronavirus Disease 2019 What To Do If  
491 You Are Sick2020. [https://www.cdc.gov/coronavirus/2019-ncov/if-you-are-sick/steps-when-](https://www.cdc.gov/coronavirus/2019-ncov/if-you-are-sick/steps-when-sick.html)  
492 [sick.html](https://www.cdc.gov/coronavirus/2019-ncov/if-you-are-sick/steps-when-sick.html) (accessed 16 June 2020).
- 493 26. Centers for Disease Control and Prevention. Households Living in Close Quarters: How  
494 to Protect Those That Are Most Vulnerable2020. [https://www.cdc.gov/coronavirus/2019-](https://www.cdc.gov/coronavirus/2019-ncov/daily-life-coping/living-in-close-quarters.html)  
495 [ncov/daily-life-coping/living-in-close-quarters.html](https://www.cdc.gov/coronavirus/2019-ncov/daily-life-coping/living-in-close-quarters.html) (accessed 16 June 2020).



- 496 27. PROMED. PRO/AH/EDR> COVID-19-update (176): China, S. Korea, countries w/ high  
497 local transmission2020. <https://promedmail.org/promed-post/?id=7325551> (accessed 16 June  
498 2020).
- 499 28. Boccia S, Ricciardi W, Ioannidis JPA. What Other Countries Can Learn From Italy  
500 During the COVID-19 Pandemic. *JAMA Intern Med* 2020.
- 501 29. Hamner L, Dubbel P, Capron I, et al. High SARS-CoV-2 Attack Rate Following  
502 Exposure at a Choir Practice - Skagit County, Washington, March 2020. *MMWR Morb Mortal*  
503 *Wkly Rep* 2020; **69**(19): 606-10.
- 504 30. Hopman J, Allegranzi B, Mehtar S. Managing COVID-19 in Low- and Middle-Income  
505 Countries. *JAMA* 2020.
- 506

507 **Table 1. Definitions used in the study**

| <b>Classification</b>  | <b>Definition</b>                                                                                                                                                                                                                                                                                                                   |
|------------------------|-------------------------------------------------------------------------------------------------------------------------------------------------------------------------------------------------------------------------------------------------------------------------------------------------------------------------------------|
| Asymptomatic contacts  | Individuals who had contact with or were in the same location as a symptomatic COVID-19 patient, and had no symptoms of COVID-19 on the first day of contact.                                                                                                                                                                       |
| Cases                  | Asymptomatic contacts of COVID-19 patients who were later diagnosed and officially reported as COVID-19 patients by 21 Apr 2020.                                                                                                                                                                                                    |
| Controls               | Asymptomatic contacts of COVID-19 patients who were never diagnosed as COVID-19 patients by 21 Apr 2020.                                                                                                                                                                                                                            |
| Index patients         | The COVID-19 patients identified from the contract tracing data as the potential source of infection. Cases (as defined above) could also be included as index patients.                                                                                                                                                            |
| Primary index patients | The earliest COVID-19 patients whose probable sources of infection were prior to the study period (1 to 31 March 2020), whom we were not able to identify the source of infection from, or whose probable sources of infection were outside the contract tracing data included in the study                                         |
| COVID-19 patients      | Individuals who had PCR positive for SARS-CoV-2, officially confirmed and reported by Department of Disease Control (DDC), Ministry of Public Health (MoPH), Thailand                                                                                                                                                               |
| Secondary attack rate  | The percentage of new cases among asymptomatic contacts with high-risk exposure                                                                                                                                                                                                                                                     |
| High-risk exposure     | Individuals who lived in the same household as a COVID-19 patient, had a direct physical contact with a COVID-19 case, had face-to-face contact with a COVID-19 case within 1 meter and longer than 15 minutes, or were in a closed environment with a COVID-19 patient at a distance of within 1 meter and longer than 15 minutes. |
| Household contact      | Individuals who lived in the same household as a COVID-19 patient                                                                                                                                                                                                                                                                   |

508

509

**Table 2. Factors associated with COVID-19 infections**

| Factors                                     | Cases<br>(n=211) | Controls<br>(n=839) | Crude odds ratio<br>(95% CI) <sup>a</sup> | P      | Adjusted odds<br>ratio (95% CI) <sup>a</sup> | P    |
|---------------------------------------------|------------------|---------------------|-------------------------------------------|--------|----------------------------------------------|------|
| <b>Male gender</b>                          | 146/211 (69%)    | 434/838 (52%)       | 0.83 (0.47-1.46)                          | 0.52   | 0.76 (0.41-1.41)                             | 0.38 |
| <b>Age group</b>                            |                  |                     |                                           |        |                                              |      |
| ≤15 years old                               | 6/211 (3%)       | 49/829 (6%)         | 0.65 (0.17-2.48)                          | 0.28   | 0.57 (0.15-2.21)                             | 0.20 |
| >15 – 40 years old                          | 94/211 (45%)     | 435/829 (52%)       | 1.0                                       |        | 1.0                                          |      |
| >40 – 65 years old                          | 98/211 (46%)     | 302/829 (36%)       | 1.66 (0.92-2.99)                          |        | 1.77 (0.94-3.32)                             |      |
| >65 years old                               | 13/211 (6%)      | 43/829 (5%)         | 1.27 (0.32-4.97)                          |        | 0.97 (0.22-4.24)                             |      |
| <b>Contact place<sup>b</sup></b>            |                  |                     |                                           |        |                                              |      |
| Nightclub                                   | 35 (17%)         | 193 (23%)           | Not applicable <sup>c</sup>               | -      | Not applicable <sup>c</sup>                  | -    |
| Boxing stadium                              | 125 (59%)        | 19 (2%)             |                                           |        |                                              |      |
| Workplace                                   | 11 (5%)          | 286 (34%)           |                                           |        |                                              |      |
| Household                                   | 38 (18%)         | 192 (23%)           |                                           |        |                                              |      |
| Others                                      | 2 (1%)           | 149 (18%)           |                                           |        |                                              |      |
| <b>Shortest distance of contact</b>         |                  |                     |                                           |        |                                              |      |
| Physical contact                            | 132/197 (67%)    | 292/809 (36%)       | 1.0                                       | 0.001  | 1.0                                          | 0.02 |
| ≤1 meter without physical contact           | 61/197 (31%)     | 335/809 (41%)       | 0.76 (0.43-1.36)                          |        | 1.09 (0.58-2.07)                             |      |
| >1 meter                                    | 4/197 (2%)       | 182/809 (22%)       | 0.08 (0.02-0.30)                          |        | 0.15 (0.04-0.63)                             |      |
| <b>Duration of contact within 1 meter</b>   |                  |                     |                                           |        |                                              |      |
| >60 minutes                                 | 180/199 (90%)    | 487/801 (61%)       | 1.0                                       | 0.003  | 1.0                                          | 0.09 |
| >15 – 60 minutes                            | 14/199 (7%)      | 162/801 (20%)       | 0.52 (0.23-1.16)                          |        | 0.67 (0.29-1.55)                             |      |
| ≤15 minutes                                 | 5/199 (3%)       | 152/801 (19%)       | 0.13 (0.04-0.46)                          |        | 0.24 (0.07-0.90)                             |      |
| <b>Sharing dishes or cups<sup>d,e</sup></b> |                  |                     |                                           |        |                                              |      |
| No                                          | 125/210 (60%)    | 576/837 (69%)       | 1.0                                       | 0.001  | 1.0                                          | 0.38 |
| Yes                                         | 85/210 (40%)     | 261/837 (31%)       | 2.72 (1.49-4.97)                          |        | 1.33 (0.70-2.54)                             |      |
| <b>Sharing cigarettes<sup>d,f</sup></b>     |                  |                     |                                           |        |                                              |      |
| No                                          | 196/209 (94%)    | 824/836 (99%)       | 1.0                                       | 0.001  | 1.0                                          | 0.04 |
| Yes                                         | 13/209 (6%)      | 12/836 (1%)         | 6.19 (2.13-17.95)                         |        | 3.47 (1.09-11.02)                            |      |
| <b>Washing hands<sup>d,g</sup></b>          |                  |                     |                                           |        |                                              |      |
| None                                        | 44/210 (21%)     | 121/826 (15%)       | 1.0                                       | <0.001 | 1.0                                          | 0.04 |
| Sometimes                                   | 114/210 (54%)    | 333/826 (40%)       | 0.40 (0.18-0.89)                          |        | 0.34 (0.14-0.81)                             |      |
| Often                                       | 52/210 (25%)     | 372/826 (45%)       | 0.19 (0.08-0.44)                          |        | 0.33 (0.13-0.87)                             |      |
| <b>Wearing masks<sup>d,h</sup></b>          |                  |                     |                                           |        |                                              |      |

|                                                    |               |               |                  |        |                  |       |
|----------------------------------------------------|---------------|---------------|------------------|--------|------------------|-------|
| Not wearing masks                                  | 102/211 (48%) | 500/834 (60%) | 1.0              | 0.003  | -                | -     |
| Wearing non-medical masks                          | 25/211 (12%)  | 77/834 (9%)   | 0.78 (0.32-1.90) |        |                  |       |
| Wearing non-medical and medical masks alternately  | 12/211 (6%)   | 48/834 (6%)   | 0.46 (0.13-1.64) |        |                  |       |
| Wearing medical masks                              | 72/211 (34%)  | 209/834 (25%) | 0.25 (0.12-0.53) |        |                  |       |
| <b>Compliance with mask wearing</b> <sup>d,h</sup> |               |               |                  |        |                  |       |
| Not wearing a mask                                 | 102/210 (49%) | 500/823 (61%) | 1.0              | <0.001 | 1.0              | 0.007 |
| Sometimes                                          | 79/210 (38%)  | 125/823 (15%) | 0.75 (0.37-1.52) |        | 0.87 (0.41-1.84) |       |
| All the time                                       | 29/210 (14%)  | 198/823 (24%) | 0.15 (0.07-0.36) |        | 0.23 (0.09-0.60) |       |

**Footnote of Table 2.** <sup>a</sup> Both crude and adjusted odds ratios were estimated using logistic regression with a random effect for location and a random effect for index patient nested within the same location. <sup>b</sup> The state enterprise office was considered and included as a workplace. Others included restaurants, markets, malls, religious places, households of index patients or other people but not living together, etc. <sup>c</sup> Location was included in the model as a random effect variable. <sup>d</sup> During the contact period. <sup>e</sup> Sharing dishes but using communal spoons all the time was considered as not sharing dishes. <sup>f</sup> Included sharing electronic cigarettes and any vaping devices. <sup>g</sup> Included washing with soap and water, and with alcohol-based solutions. <sup>h</sup> Wearing masks incorrectly (i.e. not covering both nose and mouth) was considered as not wearing.

**Table 3. Factors associated with compliance of mask wearing**

| Factors                                      | Not wearing masks<br>(n=602) | Wearing masks sometimes<br>(n=204) | Wearing masks all the time<br>(n=227) | P      |
|----------------------------------------------|------------------------------|------------------------------------|---------------------------------------|--------|
| <b>Male gender</b>                           | 324/601 (54%)                | 129/204 (63%)                      | 115/227 (51%)                         | 0.03   |
| <b>Age group</b>                             |                              |                                    |                                       |        |
| ≤15 years old                                | 45/594 (8%)                  | 5/204 (2%)                         | 3/225 (1%)                            | <0.001 |
| >15 – 40 years old                           | 269/594 (45%)                | 117/204 (57%)                      | 132/225 (59%)                         |        |
| >40 – 65 years old                           | 236/594 (40%)                | 76/204 (37%)                       | 84/225 (37%)                          |        |
| >65 years old                                | 44/594 (7%)                  | 6/204 (3%)                         | 6/225 (3%)                            |        |
| <b>Contact places</b>                        |                              |                                    |                                       |        |
| Nightclub                                    | 84 (14%)                     | 51 (25%)                           | 91 (40%)                              | <0.001 |
| Boxing stadium                               | 48 (8%)                      | 66 (32%)                           | 29 (13%)                              |        |
| Workplace <sup>a</sup>                       | 178 (30%)                    | 46 (23%)                           | 64 (28%)                              |        |
| Household                                    | 167 (28%)                    | 27 (13%)                           | 33 (15%)                              |        |
| Others <sup>b</sup>                          | 125 (21%)                    | 14 (7%)                            | 10 (4%)                               |        |
| <b>Shortest distance of contact</b>          |                              |                                    |                                       |        |
| Physical contact                             | 246/588 (42%)                | 96/191 (50%)                       | 76/212 (36%)                          | 0.005  |
| ≤1 meter without physical contact            | 238/588 (40%)                | 70/191 (37%)                       | 83/212 (39%)                          |        |
| >1 meter                                     | 104/588 (18%)                | 25/191 (13%)                       | 53/212 (25%)                          |        |
| <b>Duration of contact within 1 meter</b>    |                              |                                    |                                       |        |
| >60 minutes                                  | 396/590 (67%)                | 143/190 (75%)                      | 121/205 (59%)                         | <0.001 |
| >15 – 60 minutes                             | 120/590 (20%)                | 23/190 (12%)                       | 30/205 (15%)                          |        |
| ≤15 minutes                                  | 74/590 (13%)                 | 24/190 (13%)                       | 54/205 (26%)                          |        |
| <b>Sharing dishes or cups <sup>c,d</sup></b> |                              |                                    |                                       |        |
| No                                           | 361/601 (60%)                | 130/203 (64%)                      | 200/226 (88%)                         | <0.001 |
| Yes                                          | 240/601 (40%)                | 73/203 (36%)                       | 26/226 (12%)                          |        |
| <b>Sharing cigarettes <sup>c,e</sup></b>     |                              |                                    |                                       |        |
| No                                           | 586/600 (98%)                | 194/202 (96%)                      | 223/226 (99%)                         | 0.26   |
| Yes                                          | 14/600 (2%)                  | 8/202 (4%)                         | 3/226 (1%)                            |        |
| <b>Washing hands <sup>c,f</sup></b>          |                              |                                    |                                       |        |
| None                                         | 142/594 (24%)                | 16/203 (8%)                        | 6/224 (3%)                            | <0.001 |
| Sometimes                                    | 298/594 (50%)                | 99/203 (49%)                       | 42/224 (19%)                          |        |
| Often                                        | 154/594 (26%)                | 88/203 (43%)                       | 176/224 (79%)                         |        |

**Footnote of Table 3.** P values were estimated using univariable multinomial logistic regression models. Missing values were imputed using the imputation model. Wearing masks incorrectly (i.e. not covering both nose and mouth) was considered as not wearing. <sup>a</sup> The state enterprise office was considered and included as a workplace. <sup>b</sup> Included restaurants, markets, malls, religious places, public places, households of index patients or other people but not living together, etc. <sup>c</sup> During the contact period. <sup>d</sup> Sharing dishes but using communal spoons all the time was considered as not sharing dishes. <sup>e</sup> Included sharing electronic cigarettes and any vaping devices. <sup>f</sup> Included washing with soap and water, and with alcohol-based solutions.

**Table 4. Population attributable fraction (PAF) of risk factors for COVID-19 infection**

| Risk factors                                          | Nightclub         |                  | Boxing stadium    |                  | Workplace         |                  | Household         |                  | Other places      |                  | Overall           |                  |
|-------------------------------------------------------|-------------------|------------------|-------------------|------------------|-------------------|------------------|-------------------|------------------|-------------------|------------------|-------------------|------------------|
|                                                       | Prev <sup>a</sup> | PAF <sup>b</sup> | Prev <sup>a</sup> | PAF <sup>b</sup> | Prev <sup>a</sup> | PAF <sup>b</sup> | Prev <sup>b</sup> | PAF <sup>b</sup> | Prev <sup>a</sup> | PAF <sup>b</sup> | Prev <sup>a</sup> | PAF <sup>b</sup> |
| <b>Non-modifiable</b>                                 |                   |                  |                   |                  |                   |                  |                   |                  |                   |                  |                   |                  |
| Female gender                                         | 0.51              | 0.08             | 0.13              | 0.002            | 0.40              | 0.03             | 0.68              | 0.09             | 0.40              | 0.08             | 0.45              | 0.03             |
| Age group >15 years old                               | 1.00              | 0.32             | 0.98              | 0.05             | 0.99              | 0.37             | 0.82              | 0.26             | 0.96              | 0.37             | 0.95              | 0.15             |
| <b>Modifiable</b>                                     |                   |                  |                   |                  |                   |                  |                   |                  |                   |                  |                   |                  |
| Distance of contact <1 m <sup>c</sup>                 | 0.88              | 0.71             | 0.98              | 0.19             | 0.65              | 0.72             | 0.87              | 0.68             | 0.85              | 0.76             | 0.82              | 0.40             |
| Duration of contact within 1m >15 min <sup>c</sup>    | 0.86              | 0.55             | 0.99              | 0.11             | 0.70              | 0.57             | 0.91              | 0.53             | 0.91              | 0.64             | 0.85              | 0.29             |
| Sharing dishes or cups <sup>c,d</sup>                 | 0.34              | 0.10             | 0.30              | 0.01             | 0.19              | 0.06             | 0.57              | 0.11             | 0.26              | 0.13             | 0.33              | 0.04             |
| Sharing cigarettes <sup>c,e</sup>                     | 0.08              | 0.12             | 0.02              | 0.001            | 0.01              | 0.06             | 0                 | 0                | 0.01              | 0.007            | 0.02              | 0.02             |
| Not washing hands <sup>c,f</sup>                      | 0.05              | 0.06             | 0.21              | 0.01             | 0.20              | 0.17             | 0.10              | 0.08             | 0.28              | 0.29             | 0.16              | 0.04             |
| Not wearing masks all the time <sup>c,g</sup>         | 0.60              | 0.52             | 0.80              | 0.08             | 0.78              | 0.65             | 0.86              | 0.55             | 0.94              | 0.68             | 0.78              | 0.28             |
| <b>Sum of all modifiable risk factors<sup>i</sup></b> |                   | 0.98             |                   | 0.75             |                   | 0.98             |                   | 0.97             |                   | 0.99             |                   | 0.84             |

**Footnote of Table 4.** <sup>a</sup> Prevalence (Prev) was estimated using the imputed data set. <sup>b</sup> PAF was estimated using the direct method (Supplementary Text). <sup>c</sup> During the contact period. <sup>d</sup> Sharing a dish but using communal spoons all the time was considered as not sharing a dish. <sup>e</sup> Included sharing an electronic cigarette and any vaping device. <sup>f</sup> Washing hands included washing with soap and water, and with alcohol-based solutions. <sup>g</sup> Wearing masks incorrectly (i.e. not covering both nose and mouth) was considered as not wearing. <sup>i</sup> Age and gender were considered as non-modifiable risk factors, while other risk factors were considered as modifiable. Total PAF was directly estimated using logistic regression in the form of natural logarithm; therefore, total PAF was not equal to the direct summation of PAF of each risk factor.

## **Figure legend**

### **Figure 1. Study flow diagram**

**Footnote of Figure 1.** SRRT= Surveillance and Rapid Response Team (SRRT), Ministry of Public Health (MoPH), Thailand

### **Figure 2. Development and transmission of COVID-19 among asymptomatic contacts included in the study**

**Footnote of Figure 2.** A, B and C represent the nightclub cluster, boxing stadium cluster and state enterprise office cluster, respectively. Black nodes represent primary index patients, red dots represent cases, and green dots represent controls. Orange dots represent index patients (confirmed COVID-19 patients) who could not be contacted by the study team. Black lines represent household contacts, purple lines represent contacts at workplaces and gray lines represent contacts at other locations. Definition of index patients, cases and controls are listed in Table 1.

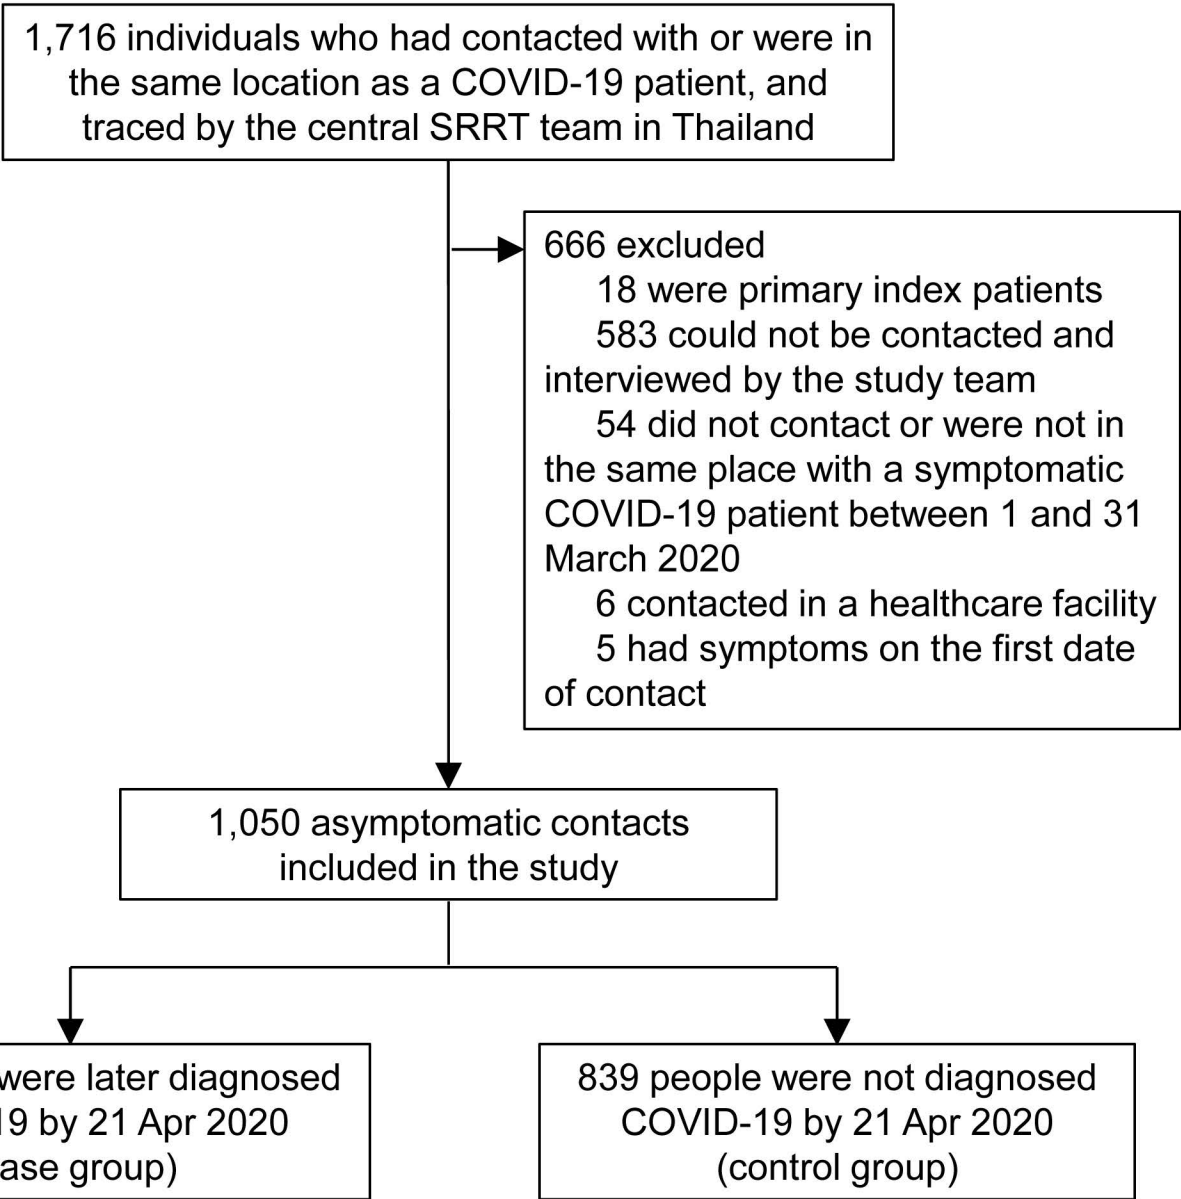



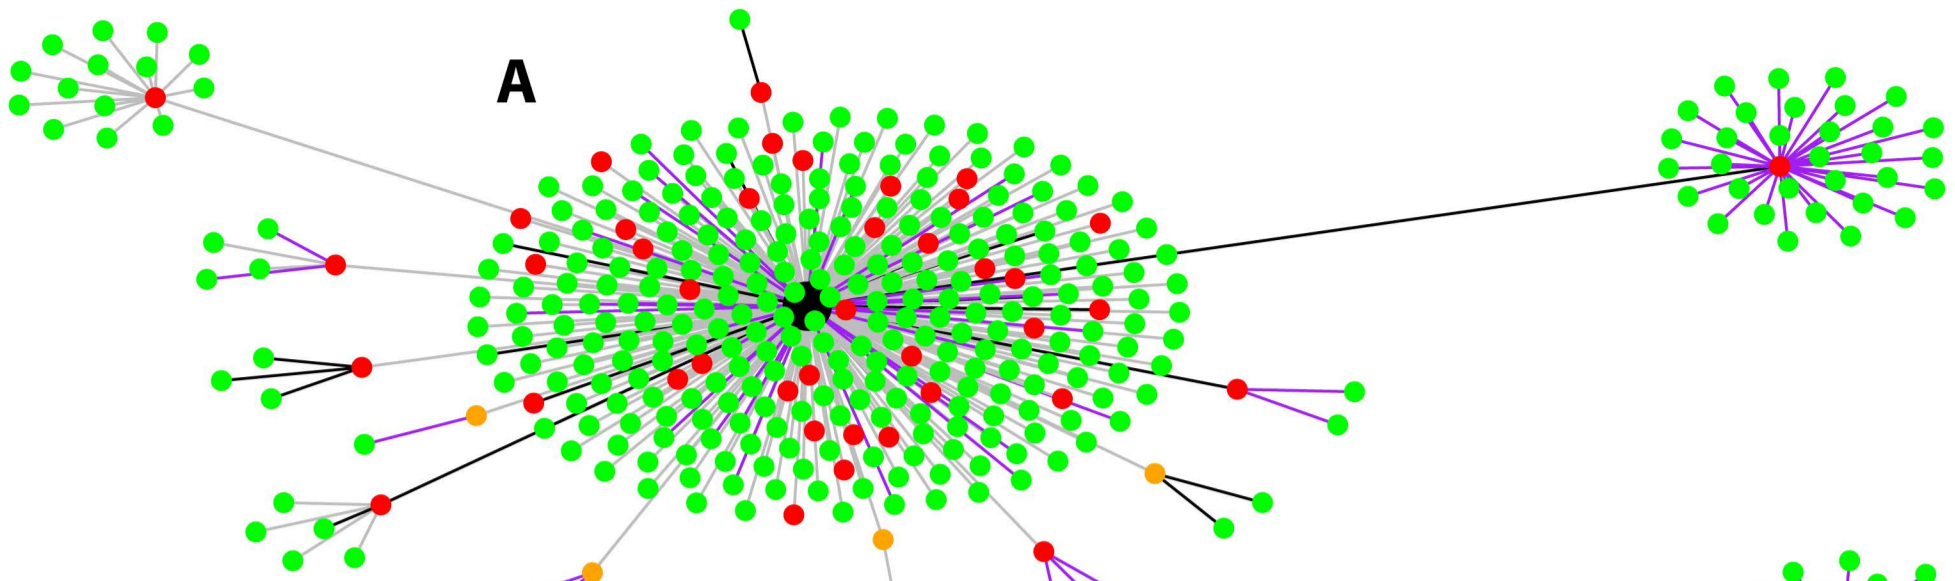

medRxiv preprint doi: <https://doi.org/10.1101/2020.06.11.20128900>; this version posted June 19, 2020. The copyright holder for this preprint (which was not certified by peer review) is the author/funder, who has granted medRxiv a license to display the preprint in perpetuity. It is made available under a [CC-BY 4.0 International license](https://creativecommons.org/licenses/by/4.0/).

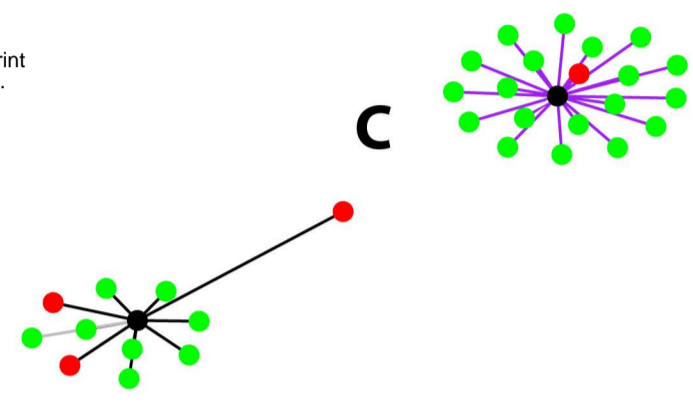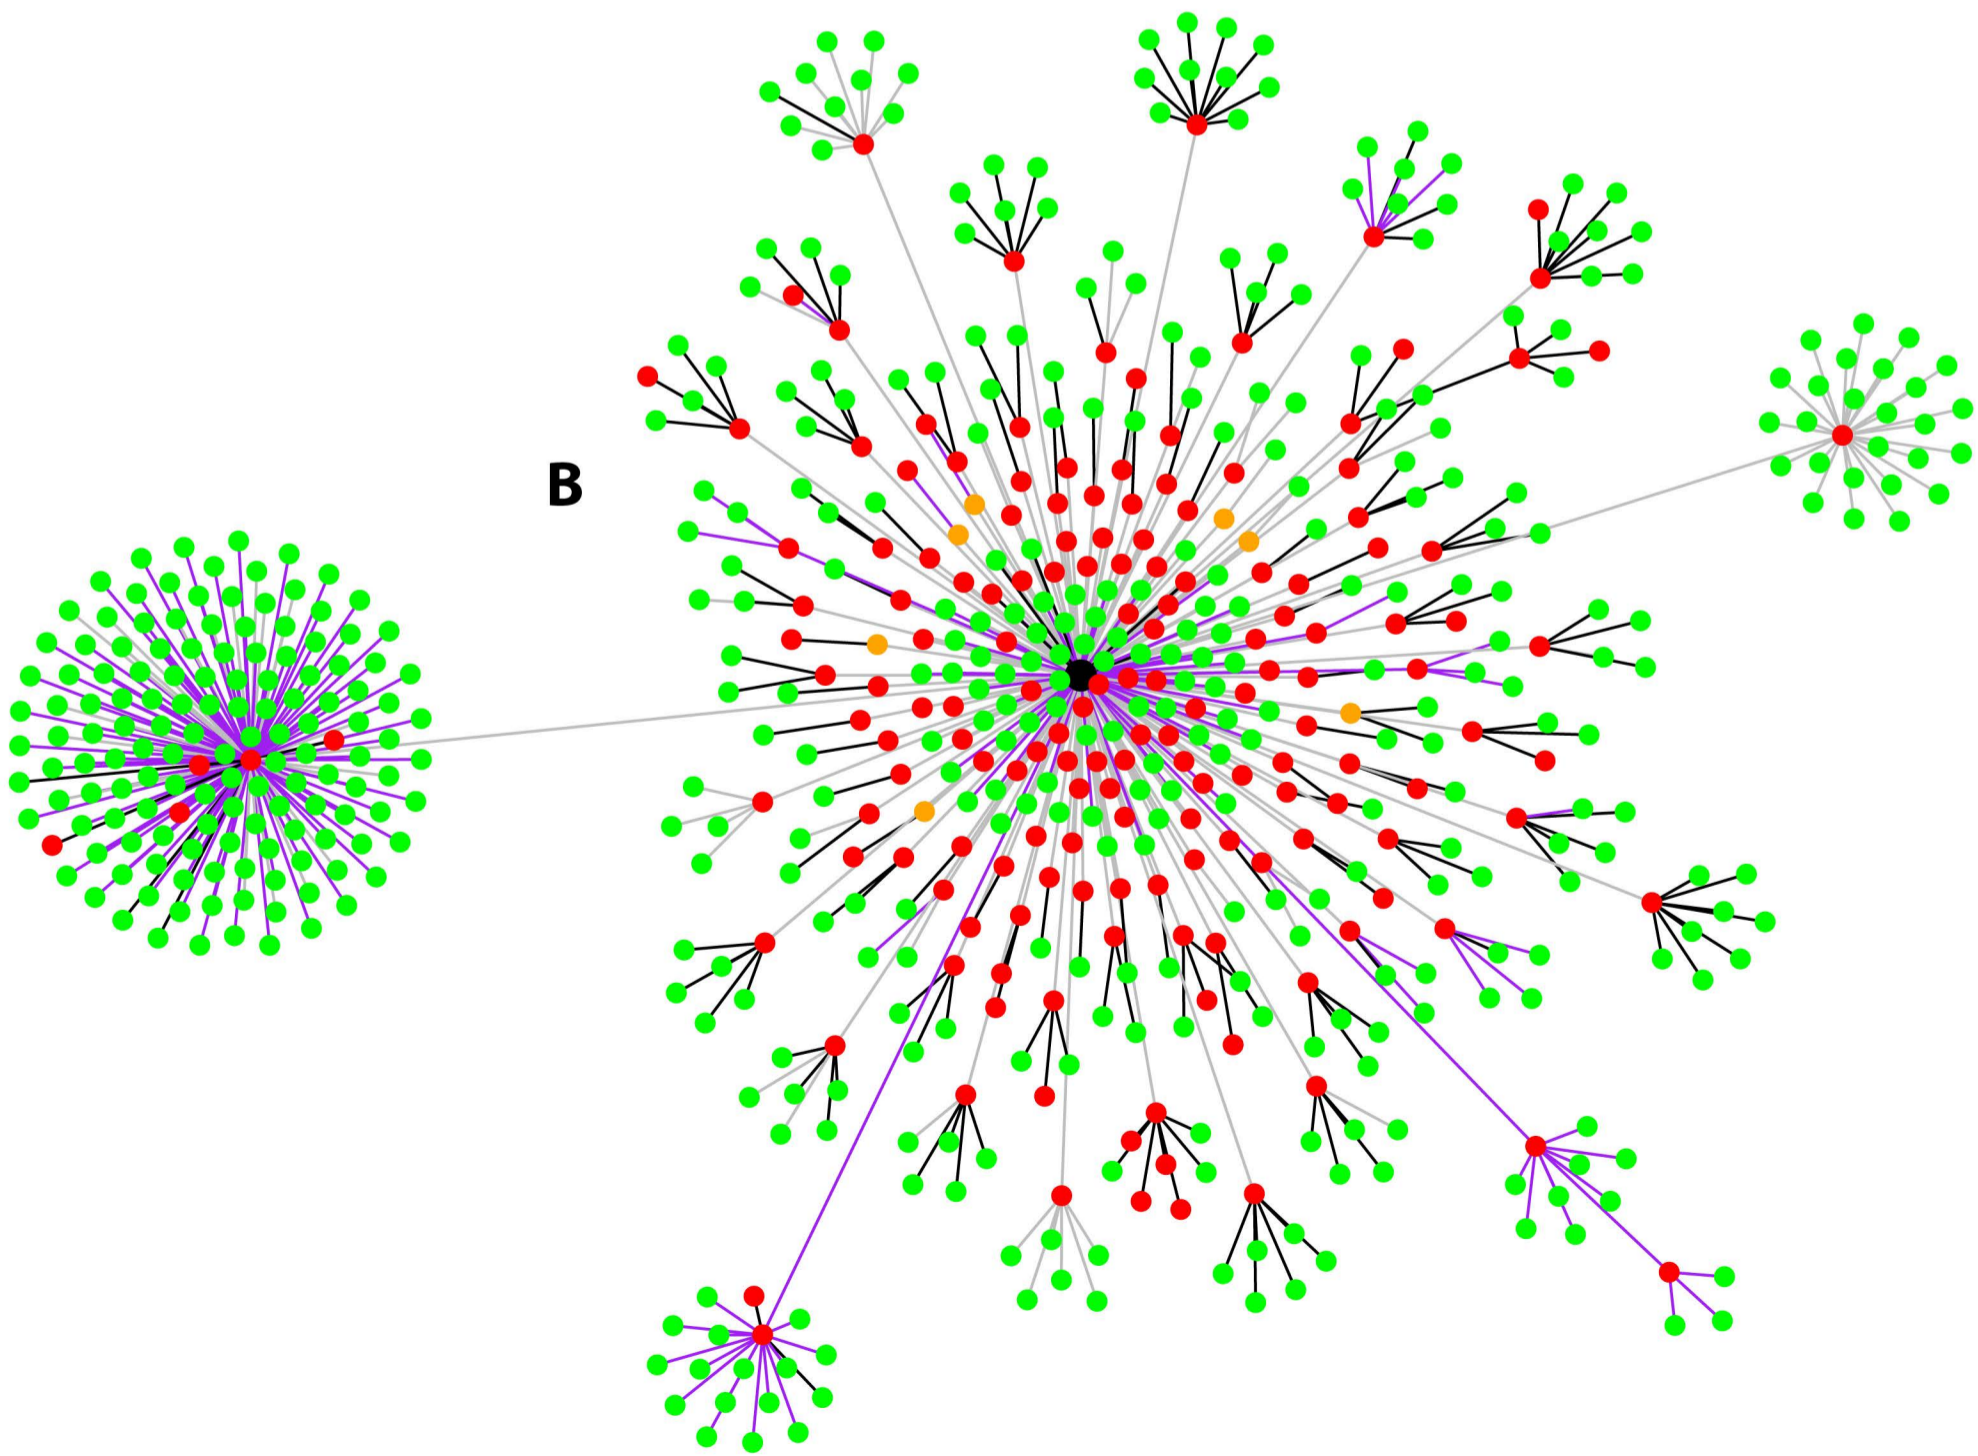

## **Supplementary Text**

### **Supplementary Methods**

#### **Study design and participants**

Contacts were classified by MoPH as high-risk contacts if they were family members or lived in the same household as a COVID-19 patient, if they were within 1-meter distance longer than 5 minutes of a COVID-19 patient, if they were exposed to cough, sneeze or secretions of a COVID-19 patient and were not wearing a protective gear, such as mask, or if they were in the same closed environment (e.g. room, nightclub, stadium, vehicle) within 1-meter distance longer than 15 minutes of a COVID-19 patient and they were not wearing a protective gear, such as mask.<sup>12,13</sup> Contacts were classified as low-risk contacts if they had activities together with or were in the same locations as a COVID-19 patient, but did not fulfil the criteria of a high-risk contact.<sup>12,13</sup> All high-risk contacts with any symptoms were tested with a PCR assay and quarantined in a hospital or a quarantine site.<sup>12,13</sup> All high-risk contacts without any symptoms were self-quarantined at home.<sup>12,13</sup> Before 23 March 2020, all high-risk contacts without any symptoms were tested using PCR assays on day 5 after the last date of exposure to a case.<sup>12</sup> As of 23 March 2020, all household contacts were tested using PCR assays regardless of their symptoms. Other high-risk contacts were tested only if they developed any COVID-19 symptoms.<sup>13</sup> All low-risk contacts were recommended to perform self-monitoring for 14 days, and visit healthcare facilities immediately for PCR-assays if they develop any symptoms of COVID-19.<sup>12,13</sup>

#### **Statistical analysis**

To respond to the national policy, we estimated direct population attributable fraction (PAF) using the imputed dataset and the direct method as previously described.<sup>27 28</sup> Direct PAF can be obtained

by calculating PAFs directly from individuals' data using logistic regression.<sup>27 28</sup> First, we had to modify our final logistic regression model by considering each risk factor dichotomously. Then, irrespective of exposure to each risk factor for each individual, that factor was removed from the population by calculating probability based on all observations as unexposed. The predicted probability of developing COVID-19 infection for each asymptomatic contact, with the assumption that there was no exposure to a certain risk factor, is:

$$P_{ki} = \frac{1}{1 + \exp[-(\beta_0 + \sum_{j \neq i} \beta_j x_j)]}$$

$P_{ki}$  is representative of predicted probability of COVID-19 infection in individual asymptomatic contact  $k$ , assuming no exposure to a specific risk factor ( $x_i$ );  $\beta_j$  indicates the regression coefficient of risk factor ( $x_j$ ), except risk factor number  $i$  ( $x_i$ ). Subsequently, the sum of all predicted probabilities for all individuals in the study would be equal to adjusted estimate of total cases, which is anticipated in the absence of that specific risk factor ( $x_i$ ).

Then, PAF was estimated by subtraction of the total number of predicted cases from total number of observed cases, divided by the total number of observed cases:

$$PAF = \frac{\text{Total number of observed cases} - \text{Total number of predicted cases}}{\text{Total number of observed cases}}$$

## Supplementary Results

For the pub cluster, we identified 11 primary index patients who started having symptoms from 4 to 8 March and were diagnosed (and isolated) from 3 to 10 March (Supplementary Figure 1). Those primary index patients visited multiple nightclubs included in the analysis during the study period, and 35 of 228 (15%) asymptomatic contacts at nightclubs had PCR-confirmed COVID-19 infections after the contact (Figure 2, Cluster A).

For the boxing stadium cluster, we identified 5 primary index patients who started having symptoms from 6 to 12 March and were diagnosed (and isolated) from 11 to 21 March (Supplementary Figure 2). Those primary index patients visited multiple boxing stadiums included in the analysis during the study period, and 125 of 144 (87%) asymptomatic contacts at the boxing stadiums had PCR-confirmed COVID-19 infections after the contact (Figure 2, Cluster B).

Of the two primary index patients for the office cluster; one had had symptoms since 15 March 2020 (Primary index patient C1 in Supplementary Figure 3) and was considered as the source of infection to one new case in the office during the study period. The other primary index patient (Primary index patient C2 in Supplementary Figure 3) was a household member of a staff at the office, and was considered as the source of infection to that staff via household contact.

**Supplementary Table 1. Factors associated with COVID-19 infections in a multivariable model including type of mask**

| <b>Factors</b>                                   | <b>Adjusted odds ratio (95% CI)<sup>a</sup></b> | <b>P</b> |
|--------------------------------------------------|-------------------------------------------------|----------|
| <b>Male gender</b>                               | 0.75 (0.40-1.38)                                | 0.35     |
| <b>Age group</b>                                 |                                                 |          |
| ≤15 years old                                    | 0.55 (0.14-2.15)                                |          |
| >15 – 40 years old                               | 1.0                                             |          |
| >40 – 65 years old                               | 1.76 (0.93-3.31)                                |          |
| >65 years old                                    | 1.00 (0.23-4.34)                                |          |
| <b>Contact place<sup>b</sup></b>                 |                                                 |          |
| Nightclub                                        | Not applicable <sup>c</sup>                     | -        |
| Boxing stadium                                   |                                                 |          |
| Workplace                                        |                                                 |          |
| Household                                        |                                                 |          |
| Others                                           |                                                 |          |
| <b>Shortest distance of contact</b>              |                                                 |          |
| Physical contact                                 | 1.0                                             | 0.02     |
| ≤1 meter without physical contact                | 1.07 (0.56-2.01)                                |          |
| >1 meter                                         | 0.15 (0.04-0.63)                                |          |
| <b>Duration of contact within 1 meter</b>        |                                                 |          |
| >60 minutes                                      | 1.0                                             | 0.09     |
| >15 – 60 minutes                                 | 0.66 (0.28-1.52)                                |          |
| ≤15 minutes                                      | 0.24 (0.06-0.91)                                |          |
| <b>Sharing dishes or cups<sup>d,e</sup></b>      |                                                 |          |
| No                                               | 1.0                                             | 0.39     |
| Yes                                              | 1.32 (0.69-2.52)                                |          |
| <b>Sharing cigarettes<sup>d,f</sup></b>          |                                                 |          |
| No                                               | 1.0                                             | 0.03     |
| Yes                                              | 3.46 (1.09-10.98)                               |          |
| <b>Washing hands<sup>d,g</sup></b>               |                                                 |          |
| None                                             | 1.0                                             | 0.04     |
| Sometimes                                        | 0.33 (0.14-0.79)                                |          |
| Often                                            | 0.33 (0.13-0.88)                                |          |
| <b>Wearing masks<sup>d,h</sup></b>               |                                                 |          |
| Not wearing masks                                | 1.0                                             | 0.55     |
| Wearing Non-medical masks                        | 1.30 (0.48-3.47)                                |          |
| Wearing Non-medical and medical mask alternately | 1.04 (0.26-4.14)                                |          |
| Wearing Medical masks                            | 0.62 (0.25-1.52)                                |          |
| <b>Wearing masks all the time<sup>d,h</sup></b>  |                                                 |          |
| No                                               | 1.0                                             | 0.006    |
| Yes                                              | 0.31 (0.12-0.80)                                |          |

**Footnote of Supplementary Table 1.** <sup>a</sup> Both crude and adjusted odds ratios were estimated using logistic regression with a random effect for location and a random effect for index patient nested within the same location. Missing values were imputed using the imputation model. <sup>b</sup> The state enterprise office was considered and included as workplaces. Others included restaurants, markets, malls, religious places, households of index patients or other people but not living together, etc. <sup>c</sup> Location was included in the model as a random effect variable. <sup>d</sup> During the contact period. <sup>e</sup> Sharing dishes but using communal spoons all the time was considered as not sharing dishes. <sup>f</sup> Included sharing electronic cigarettes and any vaping devices. <sup>g</sup> Included washing with soap and water, and with alcohol-based solutions. <sup>h</sup> Wearing masks incorrectly (i.e. not covering both nose and mouth) was considered as not wearing.

**Supplementary Figure 1. Timeline and possible transmission of primary index patients of the pub cluster**

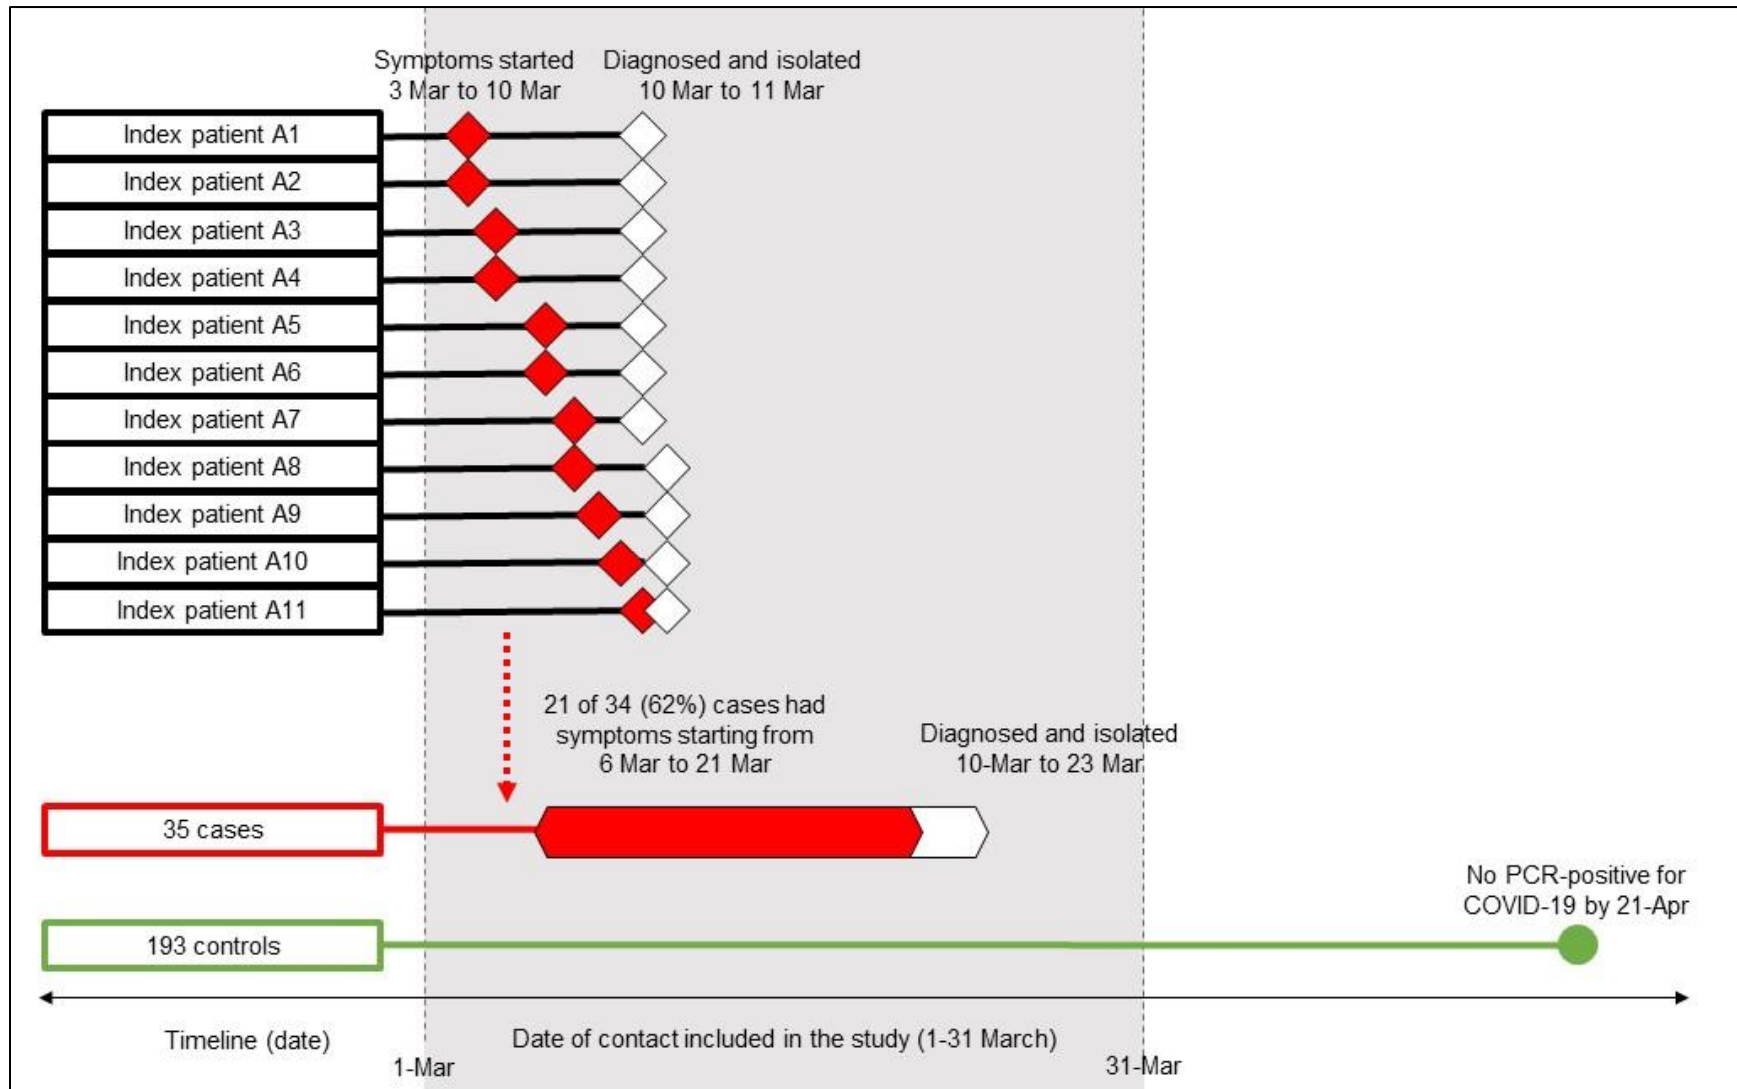

Supplementary Figure 2. Timeline and possible transmission of primary index patients of the boxing stadium cluster

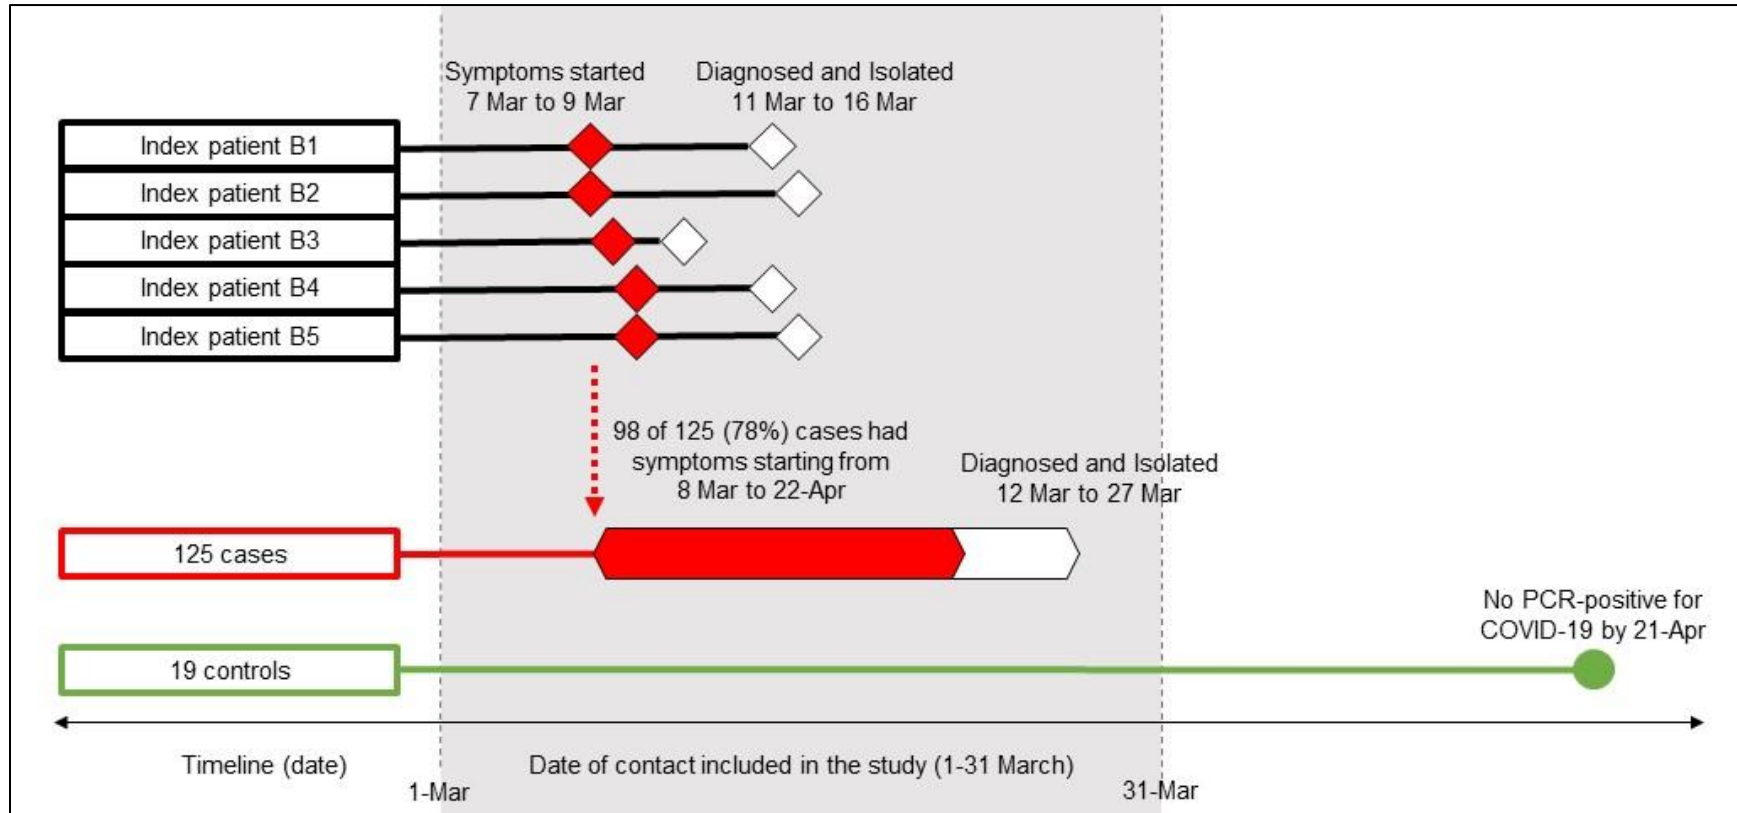



**Supplementary Figure 3. Timeline and possible transmission of primary index patients of the state enterprise office cluster**

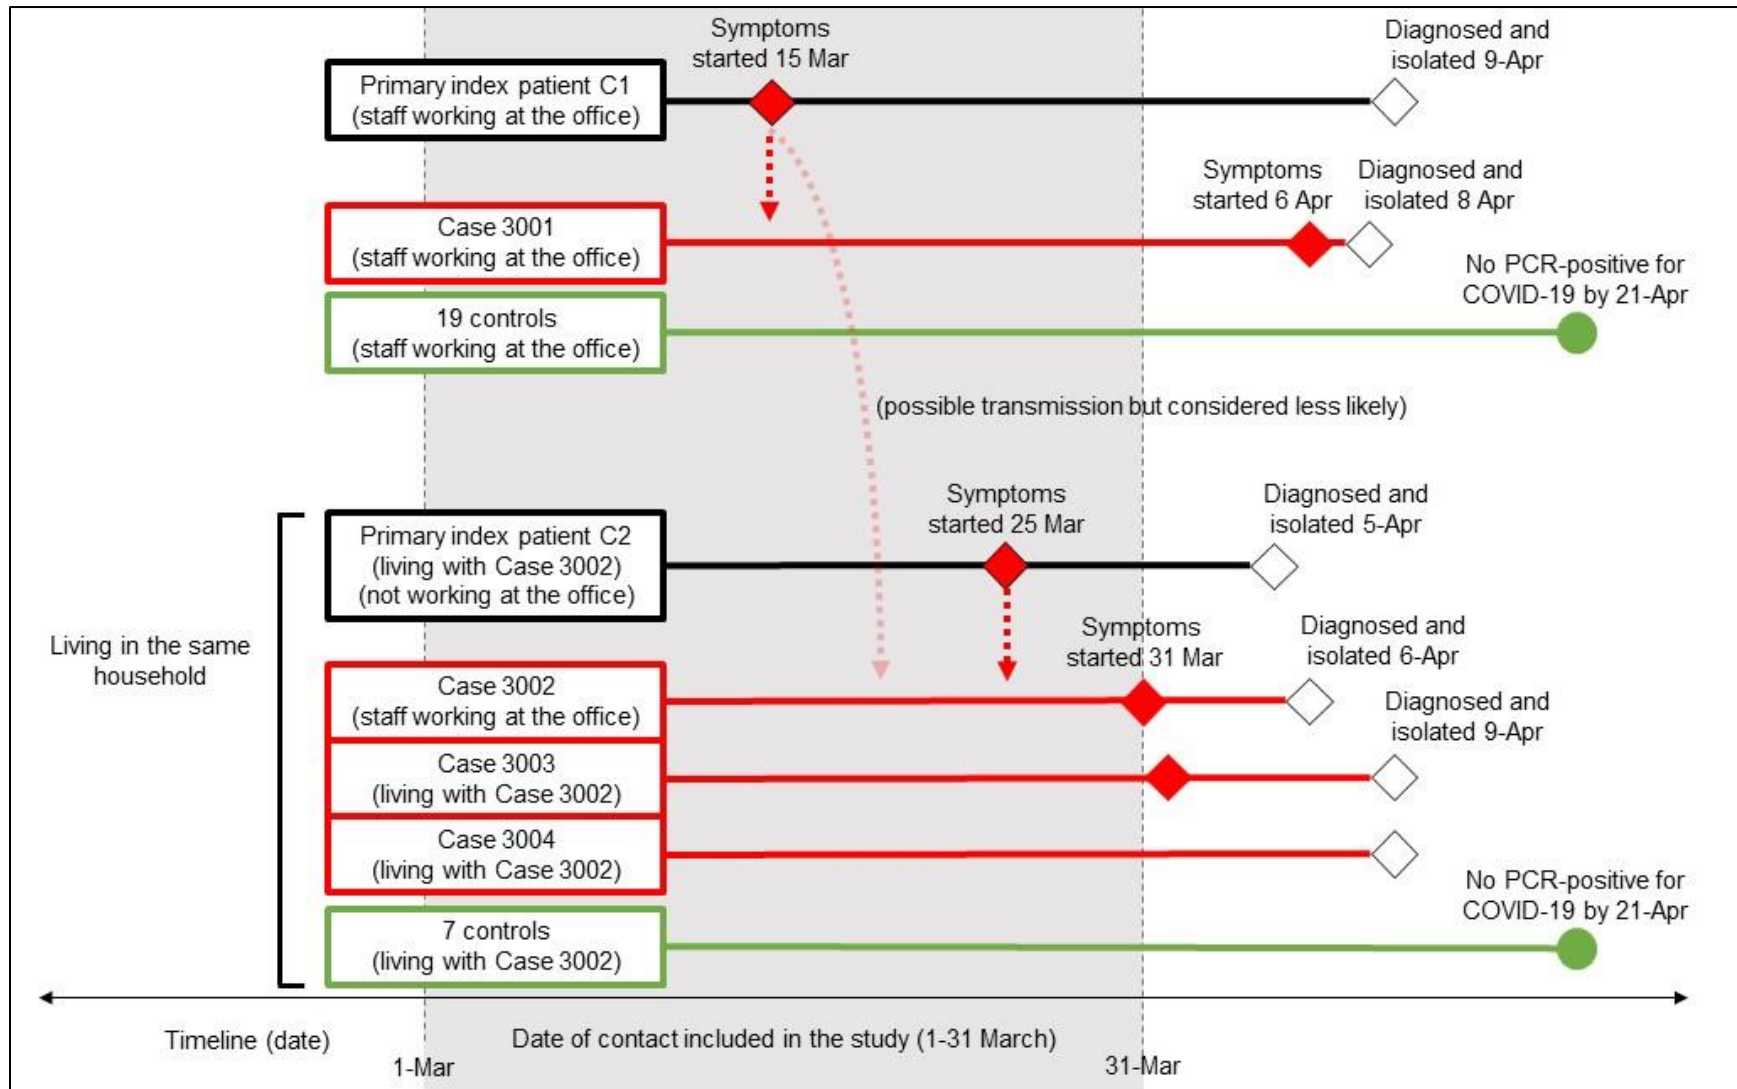

Source: https://medrxiv.org/content/10.1101/2020.06.11.20128900v3.full.pdf
